# Supplementary material
Source: publisher site journal article supplement (https://neobiota.pensoft.net/article/82636/download/suppl/36/)

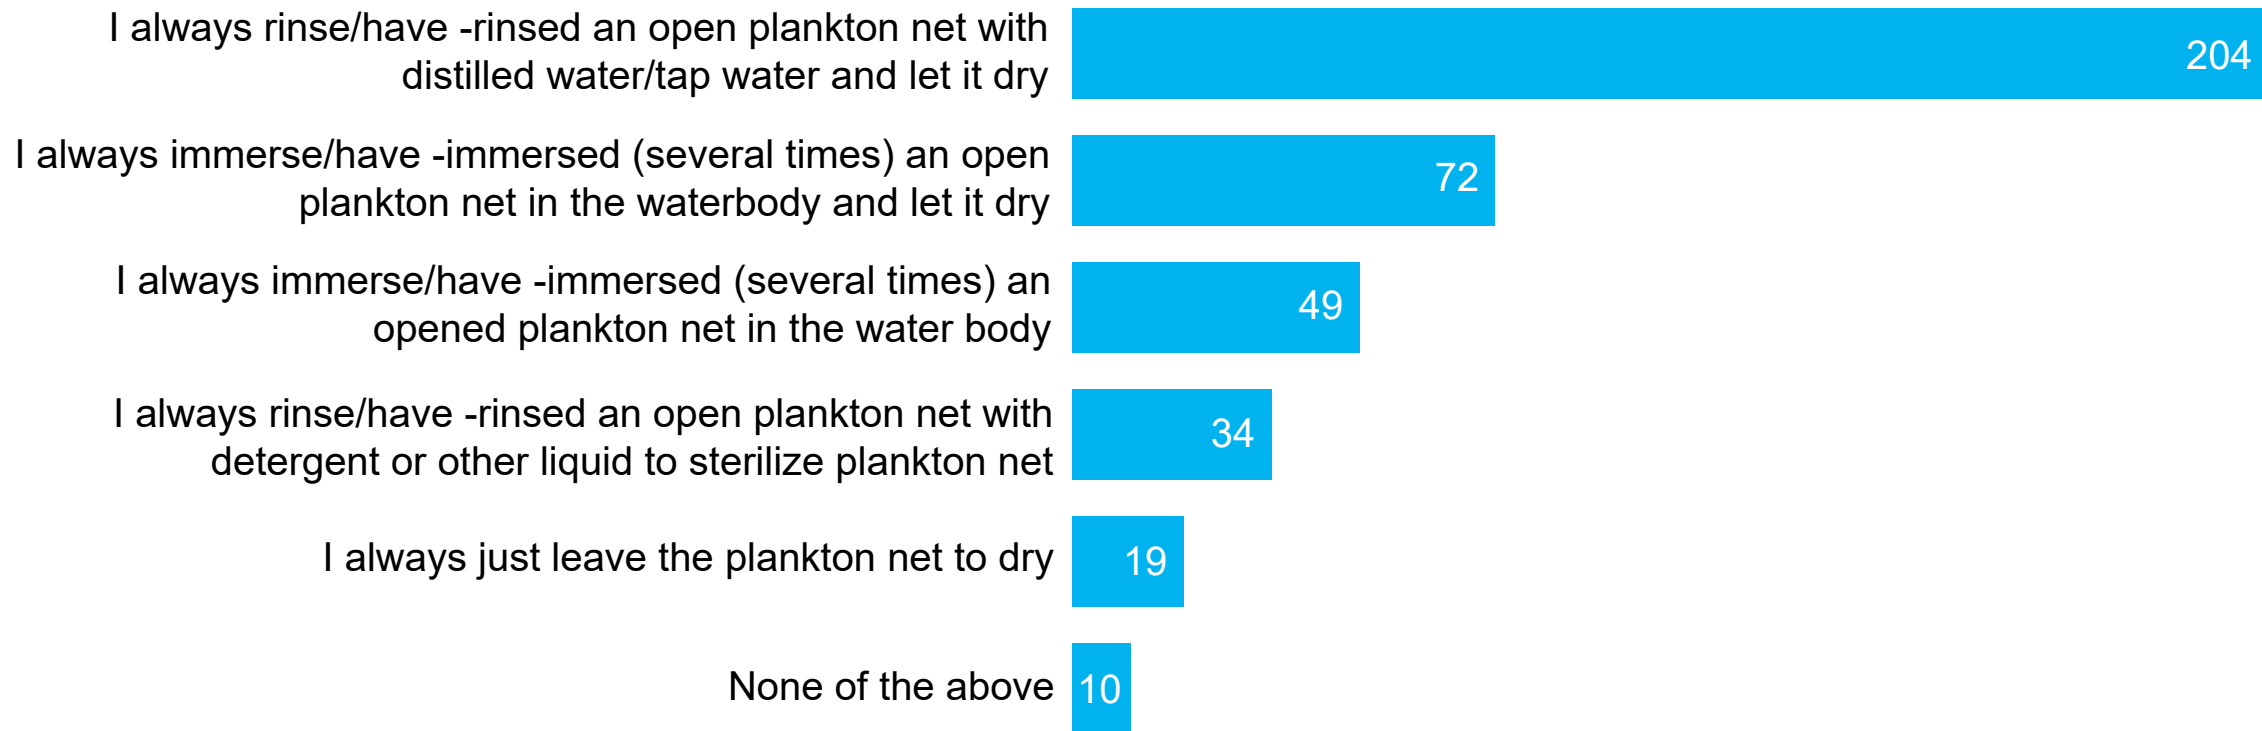

Supplement: Supplementary file 1
